# Supplementary material for: Discovery of Targetable Genetic Alterations in NSCLC Patients with Different Metastatic Patterns Using a MassARRAY-Based Circulating Tumor DNA Assay
Source: MDPI journal article supplement (doi:10.3390/cells9112337), 2020-10-22
Supplement: s1 [file s1]

**Supplementary Table S1: targets genes in the UltraSEEK lung panel**

| <b>Gene</b>   | <b>UltraSEEK™ Lung Panel Coverage (Missense mutations) Agena Bioscience</b>                                                        | <b># of mutations</b> |
|---------------|------------------------------------------------------------------------------------------------------------------------------------|-----------------------|
| <b>BRAF</b>   | Codon 469 (exon11) and codons 594, 600 (exon15)                                                                                    | 4                     |
| <b>EGFR</b>   | E709A, E709G, E709K, E709V, G719A, G719D, G719S, G719C, S768I, T790M, L858R, L861Q; L861R; C797S; Exon19 indels, Exon20 insertions | 46                    |
| <b>KRAS</b>   | Codons 12, 13 (exon 2) and 61 (exon 3)                                                                                             | 16                    |
| <b>ERBB2</b>  | Exon 20 insertions                                                                                                                 | 4                     |
| <b>PIK3CA</b> | Codons 542, 545 (exon9), codon 1047 of (exon20)                                                                                    | 4                     |
| <b>TOTAL</b>  | <b>5 genes</b>                                                                                                                     | 74                    |

**Supplementary Table S2: detected mutations and the VAF in plasma cfDNA from NSCLC patients**

| <b>Pat</b>  | <b>Amino Acid change</b> | <b>% VAF</b> |
|-------------|--------------------------|--------------|
| <b>P01</b>  | EGFR_p.E746_A750Del      | 0.4          |
| <b>P02</b>  | EGFR_p.E746_A750Del      | 0.9          |
| <b>P03</b>  | EGFR_p.E746_A750Del      | 5            |
| <b>P04</b>  | EGFR_p.E746_A750Del      | 5            |
|             | T790M                    | 0.2          |
| <b>P05</b>  | EGFR_p.L858R             | 0.4          |
| <b>P06</b>  | EGFR_p.L858R             | 1            |
| <b>P07</b>  | EGFR_p.L858R             | 0.2          |
|             | KRAS_p.G12A/p.G12V       | 1.3          |
| <b>P08</b>  | EGFR_p.E709A             | 0.4          |
| <b>P09</b>  | EGFR_p.E746_A750Del      | 1.8          |
| <b>P09B</b> | EGFR_p.E746_A750Del      | 0.8          |
|             | T790M                    | 0.4          |
| <b>P10</b>  | L.747_T751del            | 2.3          |
| <b>P11</b>  | EGFR_p.L861Q/P.L861R     | 1.2          |
|             | EGFR_p.L747_A750>P       | 1.1          |
| <b>P12</b>  | EGFR_p.N771>TH           | 0.1          |
|             | KRAS_p.G12A/p.G12V       | 0.3          |
| <b>P13</b>  | EGFR_p.L858R             | 0.6          |
|             | PIK3CA_p.H1047R          | 0.6          |
| <b>P14</b>  | KRAS_p.G12C              | 0.3          |
| <b>P15</b>  | KRAS_p.G12A/p.G12V       | 0.2          |
| <b>P16</b>  | KRAS_p.G12A/p.G12V       | 0.3          |
| <b>P17</b>  | KRAS_p.G12A/p.G12V       | 0.3          |
| <b>P18</b>  | KRAS_p.G12R              | 1            |
| <b>P19</b>  | KRAS_p.G12C              | 0.3          |
| <b>P20</b>  | KRAS_p.G12C              | 0.5          |
|             | ERBB2_p.A775_G776insYVMA | 0.5          |
| <b>P21</b>  | KRAS_p.G12F              | 0.5          |
|             | ERBB2_p.A775_G776insYVMA | 0.9          |
| <b>P22</b>  | KRAS_p.G13D              | 0.7          |
| <b>P23</b>  | KRAS_p.G12C              | 0.3          |
|             | PIK3CA_p.H1047R          | 0.8          |
| <b>P24B</b> | BRAF_p.G469A/p.G469V     | 0.2          |
| <b>P25</b>  | BRAF_p.G469A/p.G469V     | 0.7          |
| <b>P26</b>  | BRAF_p.D594G             | 0.2          |

|            |                 |     |
|------------|-----------------|-----|
| <b>P27</b> | PIK3CA_p.E545K  | 1.2 |
| <b>P28</b> | ERBB2_p.G776>VC | 0.3 |
